# Supplementary material
Source: PubMed Central journal article supplement (PMC9068858)
Supplement: 12264_2022_844_MOESM1_ESM.pdf [file 12264_2022_844_MOESM1_ESM.pdf]

## Supplementary Materials

**Table S1** Comparison of the 50% PWT between each intensity groups

| Group      | <i>P</i> Value |            |            |            |
|------------|----------------|------------|------------|------------|
|            | 20% MT (7)     | 40% MT (7) | 60% MT (6) | 80% MT (7) |
| 20% MT (7) |                |            |            |            |
| 40% MT (7) | 0.998          |            |            |            |
| 60% MT (6) | 0.187          | 0.095      |            |            |
| 80% MT (7) | < 0.001***     | < 0.001*** | 0.021**    |            |

**Table S2** Comparison of 50% PWT between different frequency groups

| Group        | <i>P</i> Value |            |            |            |            |
|--------------|----------------|------------|------------|------------|------------|
|              | 2 Hz (7)       | 15 Hz (11) | 50 Hz (10) | 100 Hz (9) | 10 kHz (9) |
| 2 Hz (7)     |                |            |            |            |            |
| 15 Hz (11)   | 0.976          |            |            |            |            |
| 50 Hz (10)   | > 0.999        | 0.895      |            |            |            |
| 100 Hz (9)   | 0.999          | 0.803      | > 0.999    |            |            |
| 10 kHz (9)   | > 0.999        | 0.914      | > 0.999    | > 0.999    |            |
| 2/100 Hz (8) | > 0.999        | 0.970      | > 0.999    | 0.999      | > 0.999    |

**Table S3** Comparison of 50% PWT between each frequency group in 24-h SCS

| Group      | <i>P</i> Value |            |            |
|------------|----------------|------------|------------|
|            | 2 Hz (7)       | 50 Hz (10) | 100 Hz (9) |
| 2 Hz (7)   |                |            |            |
| 50 Hz (10) | 0.871          |            |            |
| 100 Hz (9) | 0.997          | 0.970      |            |
| 10 kHz (9) | 0.911          | > 0.999    | 0.984      |

**Table S4** Comparison of 50% PWT between Pre- and Dur-SCS in 2-Hz SCS

|         | Group                  | Mean <sub>(Pre)</sub> ± SE (g) | Mean <sub>(Dur)</sub> ± SE (g) | <i>P</i> value |
|---------|------------------------|--------------------------------|--------------------------------|----------------|
| CTOP    | SCS + Veh              | 4.22 ± 0.38                    | 9.25 ± 1.67                    | < 0.001        |
|         | SCS + CTOP 3 µg        | 3.28 ± 0.29                    | 6.24 ± 1.28                    | 0.014          |
|         | SCS + CTOP 10 µg       | 3.96 ± 0.84                    | 4.25 ± 0.81                    | 0.948          |
| NTI     | SCS + Veh              | 4.33 ± 0.36                    | 7.06 ± 0.73                    | 0.003          |
|         | SCS + NTI 3 mg/kg      | 3.48 ± 0.48                    | 8.44 ± 1.61                    | < 0.001        |
|         | SCS + NTI 10 mg/kg     | 3.87 ± 0.44                    | 8.82 ± 1.70                    | < 0.001        |
| NOR-BNI | SCS + Veh              | 3.55 ± 0.40                    | 9.38 ± 1.54                    | < 0.001        |
|         | SCS + Nor-BNI 5.74 µg  | 3.91 ± 0.55                    | 7.18 ± 1.25                    | 0.001          |
|         | SCS + Nor-BNI 22.96 µg | 3.38 ± 0.37                    | 3.57 ± 0.34                    | 0.948          |

**Table S5** Comparison of 50% PWT in Dur-SCS between groups in 2-Hz SCS

|         | Group                         | Mean <sub>(Dur)</sub> ± SE (g) | <i>P</i> value |
|---------|-------------------------------|--------------------------------|----------------|
| CTOP    | Naive vs SCS                  | 10.82 ± 0.64 vs 9.25 ± 1.67    | 0.450          |
|         | No-SCS vs SCS                 | 5.15 ± 0.34 vs 9.25 ± 1.67     | 0.001          |
|         | SCS vs SCS + CTOP 3 µg        | 9.25 ± 1.67 vs 6.24 ± 1.28     | 0.042          |
|         | SCS vs SCS + CTOP 10 µg       | 9.25 ± 1.67 vs 4.25 ± 0.81     | < 0.001        |
| NTI     | Naive vs SCS                  | 12.44 ± 0.64 vs 7.06 ± 0.73    | < 0.001        |
|         | No-SCS vs SCS                 | 4.38 ± 0.41 vs 7.06 ± 0.73     | 0.999          |
|         | SCS vs SCS + NTI 3 mg/kg      | 7.06 ± 0.73 vs 8.44 ± 1.61     | 0.949          |
|         | SCS vs SCS + NTI 10 mg/kg     | 7.06 ± 0.73 vs 8.82 ± 1.70     | 0.614          |
| Nor-BNI | Naive vs SCS                  | 12.99 ± 0.50 vs 9.38 ± 1.54    | 0.001          |
|         | No-SCS vs SCS                 | 3.28 ± 0.25 vs 9.38 ± 1.54     | < 0.001        |
|         | SCS vs SCS + Nor-BNI 5.74 µg  | 9.38 ± 1.54 vs 7.18 ± 1.25     | 0.114          |
|         | SCS vs SCS + Nor-BNI 22.96 µg | 9.38 ± 1.54 vs 3.57 ± 0.34     | < 0.001        |

**Table S6** Comparison of 50% PWT between Pre- and Dur-SCS in 100-Hz SCS

|         | Group                  | Mean <sub>(Pre)</sub> ± SE (g) | Mean <sub>(Dur)</sub> ± SE (g) | <i>P</i> value |
|---------|------------------------|--------------------------------|--------------------------------|----------------|
| CTOP    | SCS + Veh              | 4.08 ± 0.41                    | 7.81 ± 1.40                    | 0.002          |
|         | SCS + CTOP 10 µg       | 3.39 ± 0.58                    | 10.17 ± 1.74                   | < 0.001        |
|         | SCS + CTOP 30 µg       | 2.79 ± 0.62                    | 6.14 ± 1.42                    | 0.003          |
| NTI     | SCS + Veh              | 3.85 ± 0.54                    | 9.90 ± 1.42                    | < 0.001        |
|         | SCS + NTI 3 mg/kg      | 3.21 ± 0.09                    | 6.79 ± 1.31                    | 0.002          |
|         | SCS + NTI 10 mg/kg     | 3.24 ± 0.23                    | 8.60 ± 1.73                    | < 0.001        |
| Nor-BNI | SCS + Veh              | 3.43 ± 0.49                    | 8.73 ± 2.67                    | < 0.001        |
|         | SCS + Nor-BNI 5.74 µg  | 2.64 ± 0.50                    | 5.81 ± 1.43                    | 0.002          |
|         | SCS + Nor-BNI 22.96 µg | 3.39 ± 0.58                    | 2.81 ± 0.69                    | 0.807          |

**Table S7** Comparison of 50% PWT in Dur-SCS between groups in 100-Hz SCS

| Group   |                               | Mean <sub>(Dur)</sub> ± SE (g) | <i>P</i> value |
|---------|-------------------------------|--------------------------------|----------------|
| CTOP    | Naive vs SCS                  | 11.14 ± 0.90 vs 7.81 ± 1.40    | 0.051          |
|         | No-SCS vs SCS                 | 4.31 ± 0.34 vs 7.81 ± 1.40     | 0.045          |
|         | SCS vs SCS + CTOP 3 µg        | 7.81 ± 1.40 vs 10.17 ± 1.74    | 0.244          |
|         | SCS vs SCS + CTOP 10 µg       | 7.81 ± 1.40 vs 6.14 ± 1.42     | 0.515          |
| NTI     | Naive vs SCS                  | 12.57 ± 0.82 vs 9.90 ± 1.42    | 0.066          |
|         | No-SCS vs SCS                 | 4.57 ± 0.51 vs 9.90 ± 1.42     | < 0.001        |
|         | SCS vs SCS + NTI 3 mg/kg      | 9.90 ± 1.42 vs 7.19 ± 1.53     | 0.116          |
| Nor-BNI | SCS vs SCS + NTI 10 mg/kg     | 9.90 ± 1.42 vs 8.60 ± 1.73     | 0.652          |
|         | Naive vs SCS                  | 12.71 ± 0.92 vs 8.73 ± 2.67    | 0.034          |
|         | No-SCS vs SCS                 | 2.73 ± 0.36 vs 8.73 ± 2.67     | < 0.001        |
|         | SCS vs SCS + Nor-BNI 5.74 µg  | 8.73 ± 2.67 vs 5.81 ± 1.43     | 0.102          |
|         | SCS vs SCS + Nor-BNI 22.96 µg | 8.73 ± 2.67 vs 2.81 ± 0.69     | < 0.001        |

**Table S8** Comparison of 50% PWT between Pre- and Dur-SCS in 10-kHz SCS

| Group   |                        | Mean <sub>(Pre)</sub> ± SE (g) | Mean <sub>(Dur)</sub> ± SE (g) | <i>P</i> value |
|---------|------------------------|--------------------------------|--------------------------------|----------------|
| CTOP    | SCS + Veh              | 4.13 ± 0.22                    | 8.45 ± 0.16                    | < 0.001        |
|         | SCS + CTOP 10 µg       | 3.19 ± 0.36                    | 5.46 ± 1.22                    | 0.027          |
|         | SCS + CTOP 30 µg       | 3.27 ± 0.42                    | 3.85 ± 1.18                    | 0.777          |
| NTI     | SCS + Veh              | 3.91 ± 0.27                    | 9.43 ± 1.47                    | < 0.001        |
|         | SCS + NTI 3 mg/kg      | 2.92 ± 0.61                    | 7.29 ± 1.91                    | < 0.001        |
|         | SCS + NTI 10 mg/kg     | 2.82 ± 0.54                    | 4.97 ± 1.41                    | 0.077          |
| Nor-BNI | SCS + Veh              | 3.23 ± 0.35                    | 8.30 ± 2.10                    | < 0.001        |
|         | SCS + Nor-BNI 5.74 µg  | 3.03 ± 0.79                    | 5.19 ± 1.56                    | 0.051          |
|         | SCS + Nor-BNI 22.96 µg | 2.98 ± 0.32                    | 3.55 ± 0.79                    | 0.659          |

**Table S9** Comparison of 50% PWT in Dur-SCS between groups in 10-kHz SCS

| Group   |                               | Mean <sub>(Dur)</sub> ± SE (g) | <i>P</i> value |
|---------|-------------------------------|--------------------------------|----------------|
| CTOP    | Naive vs SCS                  | 11.95 ± 0.56 vs 8.45 ± 0.16    | 0.01           |
|         | No-SCS vs SCS                 | 4.39 ± 0.20 vs 8.45 ± 0.16     | < 0.001        |
|         | SCS vs SCS + CTOP 3 µg        | 8.45 ± 0.16 vs 5.46 ± 1.22     | 0.018          |
|         | SCS vs SCS + CTOP 10 µg       | 8.45 ± 0.16 vs 3.85 ± 1.18     | < 0.001        |
| NTI     | Naive vs SCS                  | 12.33 ± 0.85 vs 9.43 ± 1.47    | 0.066          |
|         | No-SCS vs SCS                 | 4.06 ± 0.43 vs 9.43 ± 1.47     | < 0.001        |
|         | SCS vs SCS + NTI 3 mg/kg      | 9.43 ± 1.47 vs 7.29 ± 1.91     | 0.274          |
| Nor-BNI | SCS vs SCS + NTI 10 mg/kg     | 9.43 ± 1.47 vs 4.97 ± 1.41     | 0.004          |
|         | Naive vs SCS                  | 12.95 ± 0.46 vs 8.30 ± 2.10    | < 0.001        |
|         | No-SCS vs SCS                 | 3.25 ± 0.35 vs 8.30 ± 2.10     | < 0.001        |
|         | SCS vs SCS + Nor-BNI 5.74 µg  | 8.30 ± 2.10 vs 5.19 ± 1.56     | 0.055          |
|         | SCS vs SCS + Nor-BNI 22.96 µg | 8.30 ± 2.10 vs 3.55 ± 0.79     | < 0.001        |
